# Supplementary material
Source: MDPI journal article supplement (https://www.mdpi.com/2073-4433/14/6/906)
Supplement: s1 [file s1]

# Supplementary Materials:

Tian Xia <sup>1,\*</sup>, Sachraa G. Borjigin <sup>1</sup>, Julia Raneses <sup>1</sup>, Craig A. Stroud <sup>2</sup> and Stuart A. Batterman <sup>1</sup>

## Development of a dilution model

A simple *mechanistically-based* model was used to show the effect of meteorological conditions, including boundary layer height, wind speed and barometric pressure, on monitoring results measured by MPAL around the landfill. The model follows from a simplified line source model in which the landfill is considered as the only local CH<sub>4</sub> source, which is assumed to extend perpendicular to the wind direction for a sufficient distance such that a 1-D model can be used to represent downwind concentrations. Assuming a constant baseline (or background) concentration  $C_{baseline}$ , and dilution of emissions into a fully mixed layer extending between the ground level and the boundary layer height  $H$  (m), the model can be represented as:

$$Q = H u (C - C_{baseline}) \quad (S1)$$

where  $Q$  is the CH<sub>4</sub> emission rate of the line source in mg/hr-m,  $H$  is the hourly average boundary layer height (m),  $u$  is the hourly average wind speed (m/s),  $C$  is the maximum CH<sub>4</sub> measurements (mg/m<sup>3</sup>), and  $C_{baseline}$  is the CH<sub>4</sub> baseline concentration (mg/m<sup>3</sup>). From Eq. 1, it can be derived that:

$$C \propto Q (H u)^{-1} \quad (S2)$$

To eq. S2, we added terms to describe the influence of several factors on the average emission rate  $Q$ . Czepiel et al. [1] reported a significant inverse linear relationship between landfill CH<sub>4</sub> emissions and atmospheric pressure. Additionally, landfill temperature affects the rate of microbial methanogenesis and CH<sub>4</sub> emissions [2] such that:

$$C \propto P T_{soil} (H u)^{-1} \quad (S3)$$

where  $P$  is the barometric pressure and  $T_{soil}$  is the estimated soil temperature. In this study, we examined use of both the hourly average barometric pressure ( $P$ ) and the 6-hour barometric pressure change ( $\Delta P_{6h}$ ). The final model, Eq. 2 and Model 6 in Table 3 in the main text, were based on Eq. S3.

**Table S1.** Visit date, time, number of observations and average, standard deviation (SD) and top CH<sub>4</sub> concentration percentiles (in ppm) at Landfill C.

| Date      | Start Time | End Time | NOBs  | Average | SD   | 95%   | 98%   | 99%   | 99.90% | Max   |
|-----------|------------|----------|-------|---------|------|-------|-------|-------|--------|-------|
| 5/19/2021 | 15:31:27   | 15:46:11 | 885   | 2.79    | 1.84 | 7.12  | 8.70  | 10.64 | 12.26  | 12.26 |
| 5/27/2021 | 16:10:56   | 16:26:05 | 909   | 2.04    | 0.20 | 2.31  | 2.86  | 3.24  | 3.33   | 3.33  |
| 6/2/2021  | 12:14:18   | 12:30:26 | 965   | 2.67    | 1.13 | 4.71  | 7.09  | 8.30  | 10.35  | 10.35 |
| 6/5/2021  | 7:10:50    | 10:38:33 | 1102  | 3.29    | 1.74 | 6.89  | 7.38  | 8.86  | 11.67  | 11.67 |
| 6/7/2021  | 15:47:12   | 16:05:43 | 1112  | 2.60    | 0.97 | 4.21  | 5.24  | 6.51  | 7.03   | 7.04  |
| 6/8/2021  | 9:44:00    | 10:01:07 | 1028  | 2.39    | 0.69 | 3.61  | 4.32  | 4.64  | 5.32   | 5.33  |
| 6/9/2021  | 12:47:44   | 12:59:55 | 732   | 2.33    | 0.93 | 3.25  | 6.08  | 8.14  | 9.77   | 9.77  |
| 6/16/2021 | 10:40:54   | 10:56:09 | 913   | 2.04    | 0.03 | 2.09  | 2.12  | 2.18  | 2.25   | 2.25  |
| 6/23/2021 | 9:02:04    | 9:19:02  | 1018  | 3.80    | 1.93 | 7.23  | 7.85  | 8.11  | 8.90   | 8.90  |
| 7/1/2021  | 13:30:47   | 13:52:34 | 1297  | 2.11    | 0.18 | 2.56  | 2.66  | 2.71  | 2.95   | 2.95  |
| 7/19/2021 | 17:29:00   | 20:14:00 | 9881  | 3.15    | 1.57 | 6.61  | 8.52  | 9.75  | 12.55  | 13.34 |
| 7/20/2021 | 6:08:41    | 8:59:04  | 10203 | 5.66    | 2.78 | 10.60 | 12.33 | 13.68 | 16.29  | 20.70 |
| 8/3/2021  | 6:23:43    | 8:59:34  | 9295  | 7.24    | 5.92 | 19.03 | 22.83 | 24.69 | 30.93  | 36.38 |
| 9/20/2021 | 7:10:26    | 10:26:00 | 8273  | 6.80    | 5.73 | 19.43 | 21.92 | 23.11 | 25.12  | 26.42 |
| 9/29/2021 | 8:03:57    | 10:30:23 | 6256  | 3.55    | 1.50 | 6.65  | 7.82  | 8.27  | 8.80   | 8.81  |

**Table S2.** Maximum CH<sub>4</sub> concentrations (in ppm) measured at each landfill at different averaging times.

| <b>Landfill</b>               | <b>1s</b> | <b>5s</b> | <b>10s</b> | <b>20s</b> | <b>60s</b> |
|-------------------------------|-----------|-----------|------------|------------|------------|
| <i>Phase 1: 05/19 --07/01</i> |           |           |            |            |            |
| A                             | 5.71      | 5.70      | 5.64       | 5.61       | 5.10       |
| B                             | 10.57     | 10.34     | 9.89       | 8.37       | 7.15       |
| C                             | 12.26     | 11.54     | 10.37      | 9.16       | 7.27       |
| D                             | 7.45      | 6.77      | 5.69       | 5.47       | 4.15       |
| E                             | 3.97      | 3.90      | 3.57       | 3.53       | 3.06       |
| F                             | 4.49      | 4.42      | 4.27       | 4.23       | 3.33       |
| G                             | 4.69      | 4.63      | 4.56       | 4.36       | 3.51       |
| H                             | 4.61      | 4.49      | 4.19       | 3.90       | 2.85       |
| <i>Phase 2: 07/19 --09/29</i> |           |           |            |            |            |
| A                             | 16.02     | 15.32     | 14.94      | 14.03      | 11.18      |
| B                             | 37.58     | 37.22     | 33.76      | 28.67      | 19.32      |
| C                             | 36.38     | 33.96     | 28.06      | 26.10      | 24.21      |
| D                             | 29.69     | 28.44     | 27.45      | 26.62      | 26.41      |

**Table S3.** Results for the multivariate models. Parameters estimated using bootstrapping.

| Equation                                                                                                                                                                                                                 | Conc. | R <sup>2</sup> | k <sub>1</sub> | k <sub>2</sub> | k <sub>3</sub> | k <sub>4</sub> | k <sub>5</sub> | k <sub>6</sub> | k <sub>7</sub> |
|--------------------------------------------------------------------------------------------------------------------------------------------------------------------------------------------------------------------------|-------|----------------|----------------|----------------|----------------|----------------|----------------|----------------|----------------|
| k <sub>1</sub> +k <sub>2</sub> /H+k <sub>3</sub> /u+k <sub>4</sub> P <sub>g,6h</sub>                                                                                                                                     | Ave   | 0.564          | 2.52           | -2.74          | 2.81           | -2.99          | -              | -              | -              |
|                                                                                                                                                                                                                          | 98%   | 0.618          | 4.94           | -10.13         | 10.34          | -13.49         | -              | -              | -              |
|                                                                                                                                                                                                                          | 99%   | 0.626          | 5.83           | -11.21         | 10.82          | -15.06         | -              | -              | -              |
|                                                                                                                                                                                                                          | Max   | 0.734          | 5.88           | -14.34         | 17.24          | -21.92         | -              | -              | -              |
| k <sub>1</sub> +k <sub>2</sub> /H+k <sub>3</sub> /u+k <sub>4</sub> P <sub>g,6h</sub> +k <sub>5</sub> T <sub>soil,30</sub>                                                                                                | Ave   | 0.705          | 0.64           | -1.79          | 1.86           | -1.92          | 0.14           | -              | -              |
|                                                                                                                                                                                                                          | 98%   | 0.685          | 0.20           | -7.73          | 7.94           | -10.78         | 0.35           | -              | -              |
|                                                                                                                                                                                                                          | 99%   | 0.667          | 1.92           | -9.23          | 8.85           | -12.83         | 0.28           | -              | -              |
|                                                                                                                                                                                                                          | Max   | 0.755          | 1.90           | -12.32         | 15.23          | -19.64         | 0.29           | -              | -              |
| k <sub>1</sub> +k <sub>2</sub> /H+k <sub>3</sub> /u+k <sub>4</sub> P <sub>g,6h</sub> +k <sub>5</sub> T <sub>soil,30</sub><br>+ k <sub>6</sub> /(H u)                                                                     | Ave   | 0.711          | 0.37           | 12.25          | 2.44           | -1.79          | 0.14           | -40.51         | -              |
|                                                                                                                                                                                                                          | 98%   | 0.710          | -1.88          | 100.89         | 12.47          | -9.76          | 0.37           | -313.60        | -              |
|                                                                                                                                                                                                                          | 99%   | 0.705          | -0.78          | 131.56         | 14.71          | -11.51         | 0.32           | -406.47        | -              |
|                                                                                                                                                                                                                          | Max   | 0.774          | -0.79          | 127.96         | 21.07          | -18.32         | 0.32           | -405.01        | -              |
| k <sub>1</sub> +k <sub>2</sub> /H+k <sub>3</sub> /u+k <sub>4</sub> P <sub>g,6h</sub> +k <sub>5</sub> T <sub>soil,30</sub><br>+k <sub>6</sub> P <sub>g,6h</sub> /H                                                        | Ave   | 0.722          | 0.06           | 7.55           | 1.71           | -1.29          | 0.17           | -58.36         | -              |
|                                                                                                                                                                                                                          | 98%   | 0.732          | -3.29          | 48.57          | 7.06           | -6.99          | 0.52           | -351.76        | -              |
|                                                                                                                                                                                                                          | 99%   | 0.725          | -2.21          | 57.32          | 7.81           | -8.36          | 0.49           | -415.78        | -              |
|                                                                                                                                                                                                                          | Max   | 0.780          | -1.94          | 49.46          | 14.26          | -15.49         | 0.48           | -385.99        | -              |
| k <sub>1</sub> +k <sub>2</sub> /H+k <sub>3</sub> /u+k <sub>4</sub> P <sub>g,6h</sub> +k <sub>5</sub> T <sub>soil,30</sub><br>+k <sub>6</sub> T <sub>soil,30</sub> /H                                                     | Ave   | 0.705          | 0.79           | -8.80          | 1.85           | -1.99          | 0.13           | 0.50           | -              |
|                                                                                                                                                                                                                          | 98%   | 0.687          | -0.99          | 49.00          | 8.05           | -10.25         | 0.41           | -4.06          | -              |
|                                                                                                                                                                                                                          | 99%   | 0.672          | -0.05          | 84.33          | 9.02           | -11.96         | 0.39           | -6.70          | -              |
|                                                                                                                                                                                                                          | Max   | 0.755          | 1.23           | 19.58          | 15.29          | -19.34         | 0.33           | -2.28          | -              |
| k <sub>1</sub> +k <sub>2</sub> /H+k <sub>3</sub> /u+k <sub>4</sub> P <sub>g,6h</sub> +k <sub>5</sub> T <sub>soil,30</sub><br>+k <sub>6</sub> P <sub>g,6h</sub> /u                                                        | Ave   | 0.786          | 0.16           | -1.13          | 1.20           | 5.50           | 0.18           | -22.86         | -              |
|                                                                                                                                                                                                                          | 98%   | 0.748          | -1.34          | -5.61          | 5.81           | 13.12          | 0.49           | -73.64         | -              |
|                                                                                                                                                                                                                          | 99%   | 0.729          | 0.30           | -6.99          | 6.59           | 12.38          | 0.44           | -77.69         | -              |
|                                                                                                                                                                                                                          | Max   | 0.834          | -0.71          | -8.73          | 11.62          | 20.77          | 0.54           | -124.53        | -              |
| k <sub>1</sub> +k <sub>2</sub> /H+k <sub>3</sub> /u+k <sub>4</sub> P <sub>g,6h</sub> +k <sub>5</sub> T <sub>soil,30</sub><br>+k <sub>6</sub> T <sub>soil,30</sub> /u                                                     | Ave   | 0.710          | 1.52           | -1.44          | -1.39          | -2.04          | 0.10           | 0.14           | -              |
|                                                                                                                                                                                                                          | 98%   | 0.696          | 4.92           | -5.90          | -9.47          | -11.41         | 0.13           | 0.77           | -              |
|                                                                                                                                                                                                                          | 99%   | 0.679          | 7.37           | -7.11          | -11.25         | -13.56         | 0.03           | 0.89           | -              |
|                                                                                                                                                                                                                          | Max   | 0.770          | 10.22          | -9.09          | -15.46         | -20.75         | -0.09          | 1.36           | -              |
| k <sub>1</sub> +k <sub>2</sub> /H+k <sub>3</sub> /u+k <sub>4</sub> P <sub>g,6h</sub> +k <sub>5</sub> T <sub>soil,30</sub><br>+k <sub>6</sub> P <sub>g,6h</sub> T <sub>soil,30</sub>                                      | Ave   | 0.779          | 0.28           | -1.94          | 1.96           | 8.27           | 0.15           | -0.58          | -              |
|                                                                                                                                                                                                                          | 98%   | 0.742          | -0.97          | -8.22          | 8.28           | 21.87          | 0.38           | -1.87          | -              |
|                                                                                                                                                                                                                          | 99%   | 0.717          | 0.75           | -9.71          | 9.18           | 19.69          | 0.32           | -1.86          | -              |
|                                                                                                                                                                                                                          | Max   | 0.809          | 0.17           | -13.04         | 15.73          | 28.35          | 0.35           | -2.74          | -              |
| k <sub>1</sub> +k <sub>2</sub> /H+k <sub>3</sub> /u+k <sub>4</sub> P <sub>g,6h</sub> +k <sub>5</sub> T <sub>soil,30</sub><br>+ k <sub>6</sub> /(H u)+k <sub>7</sub> P <sub>g,6h</sub> /u                                 | Ave   | 0.805          | -0.40          | 25.56          | 2.23           | 6.55           | 0.19           | -76.83         | -25.33         |
|                                                                                                                                                                                                                          | 98%   | 0.795          | -4.55          | 147.01         | 11.74          | 19.14          | 0.56           | -439.47        | -87.78         |
|                                                                                                                                                                                                                          | 99%   | 0.793          | -3.68          | 181.56         | 13.92          | 19.81          | 0.52           | -542.91        | -95.15         |
|                                                                                                                                                                                                                          | Max   | 0.875          | -5.18          | 203.74         | 19.88          | 29.15          | 0.62           | -611.79        | -144.21        |
| k <sub>1</sub> +k <sub>2</sub> /H+k <sub>3</sub> /u+k <sub>4</sub> P <sub>g,6h</sub> +k <sub>5</sub> T <sub>soil,30</sub><br>+k <sub>6</sub> P <sub>g,6h</sub> T <sub>soil,30</sub> +k <sub>7</sub> P <sub>g,6h</sub> /u | Ave   | 0.787          | 0.18           | -1.37          | 1.42           | 6.77           | 0.17           | -0.19          | -16.34         |
|                                                                                                                                                                                                                          | 98%   | 0.749          | -1.30          | -6.32          | 6.47           | 16.91          | 0.46           | -0.58          | -54.26         |
|                                                                                                                                                                                                                          | 99%   | 0.729          | 0.30           | -7.06          | 6.66           | 12.77          | 0.43           | -0.06          | -75.71         |
|                                                                                                                                                                                                                          | Max   | 0.836          | -0.79          | -7.39          | 10.36          | 13.61          | 0.58           | 1.09           | -161.14        |



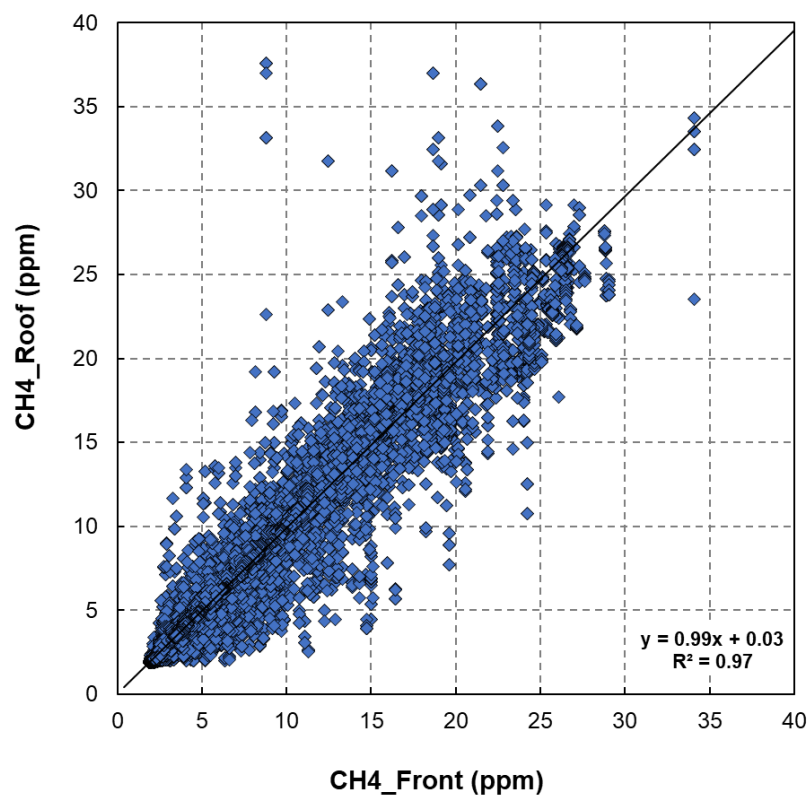

**Figure S2.** Comparison between the roof and front bumper inlet CH<sub>4</sub> measurements.

All data were collected around the landfills 05/19/21 - 09/29/21. N=169,067; Averaging time = 1 s.

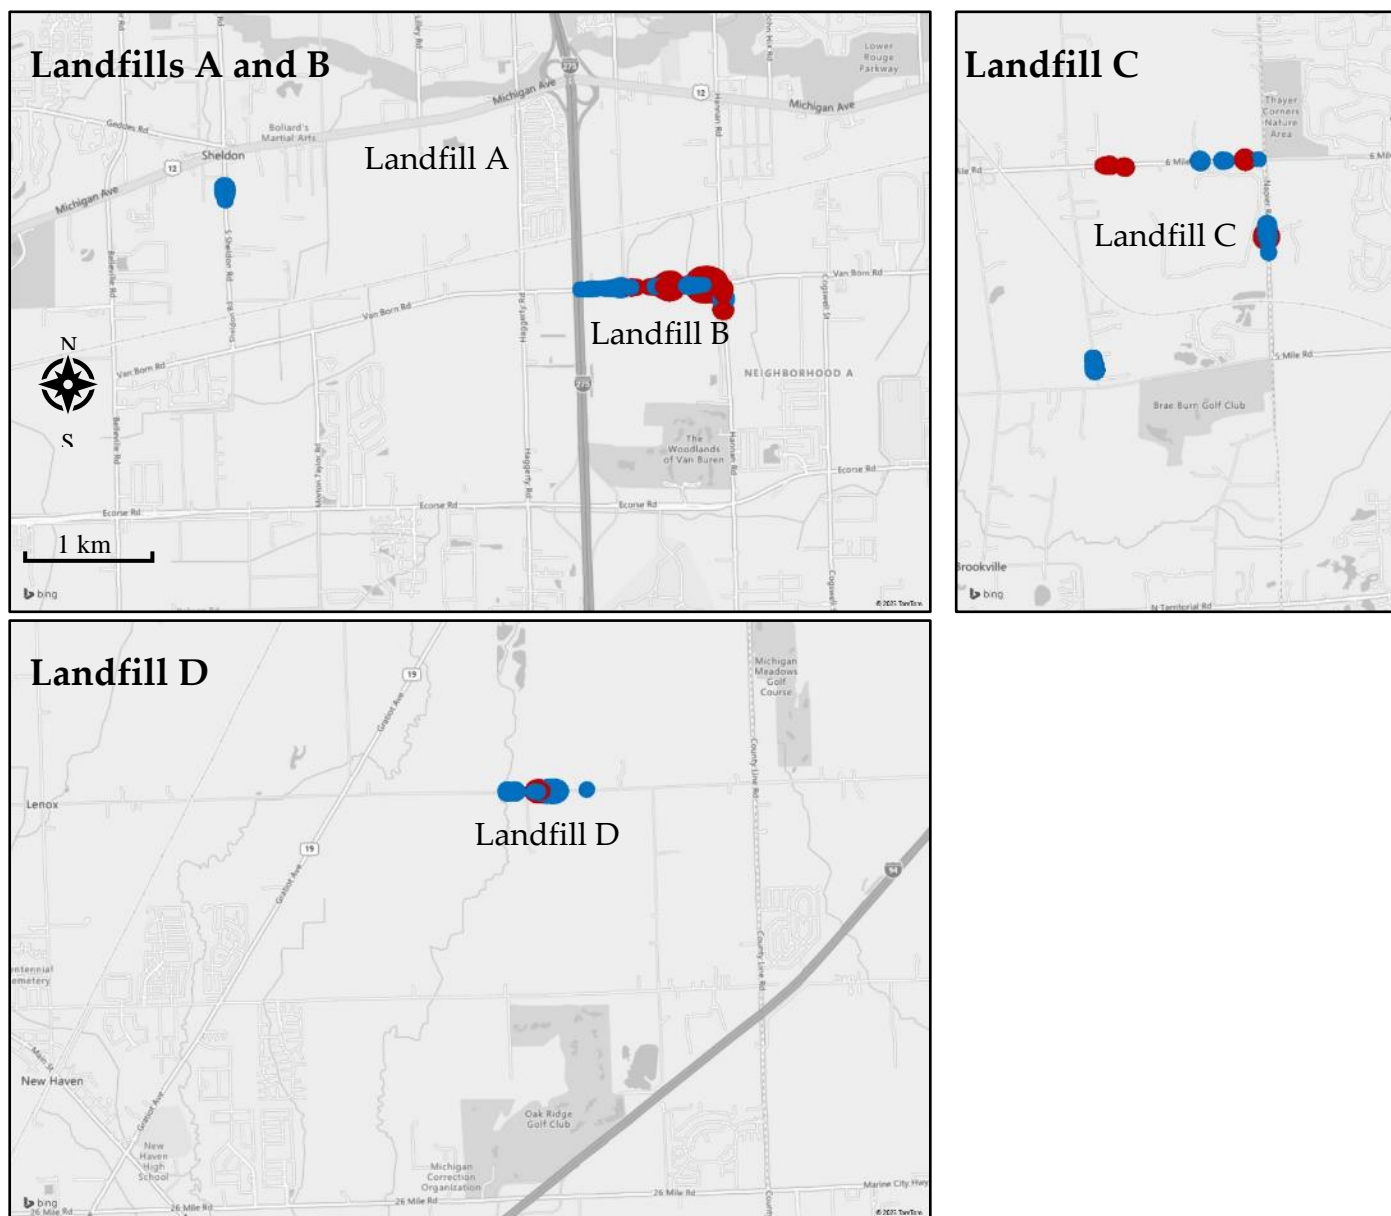

**Figure S3.** Locations where the roof and front bumper inlet measurements showed > 5 ppm difference.

Blue circles show roof measurements < near-ground measurements; Red circles show roof measurements > near-ground measurements. Circle size indicates size of concentration difference (5.0 to 28.8 ppm).



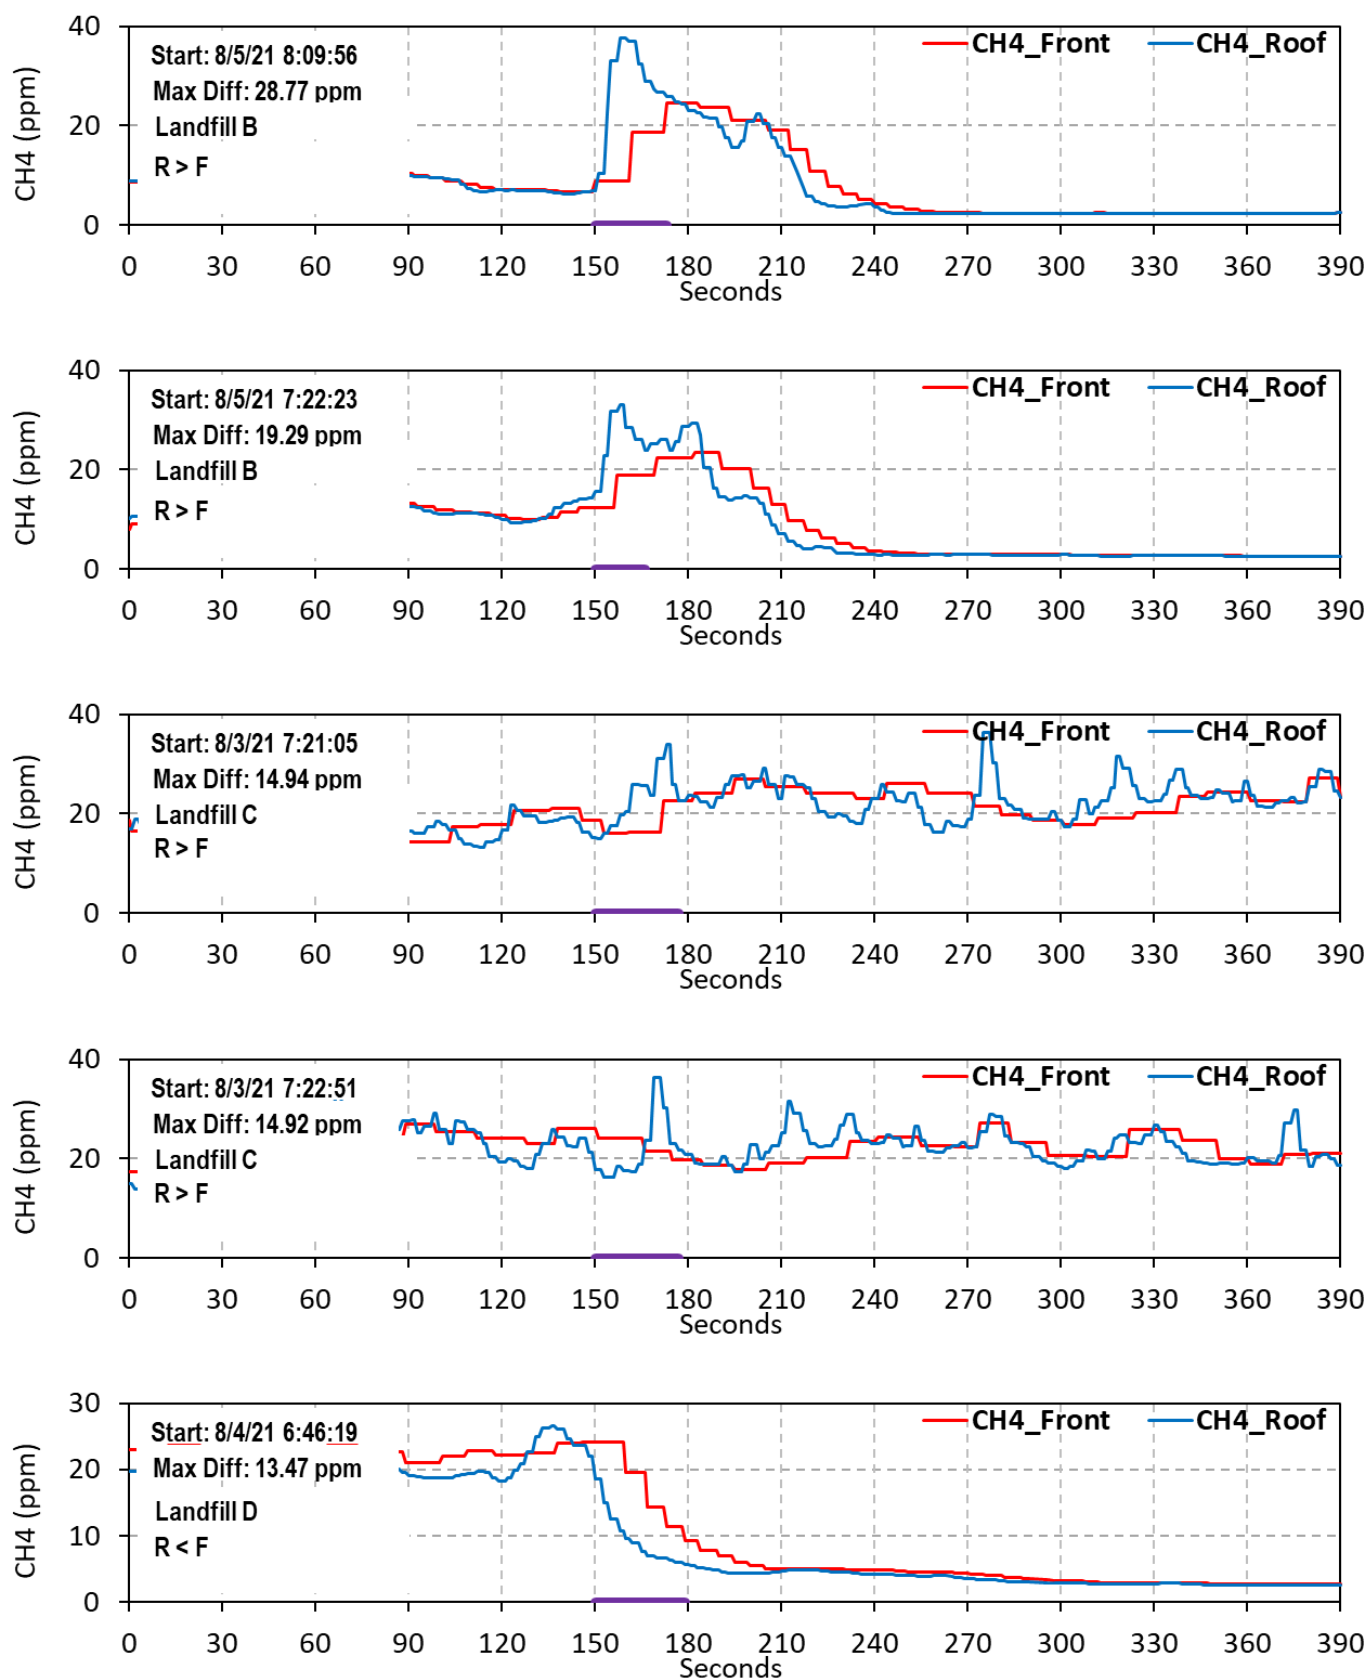

**Figure S4.** Trend plots of the five CH<sub>4</sub> peaks with the largest roof-top and near-ground measurement differences.

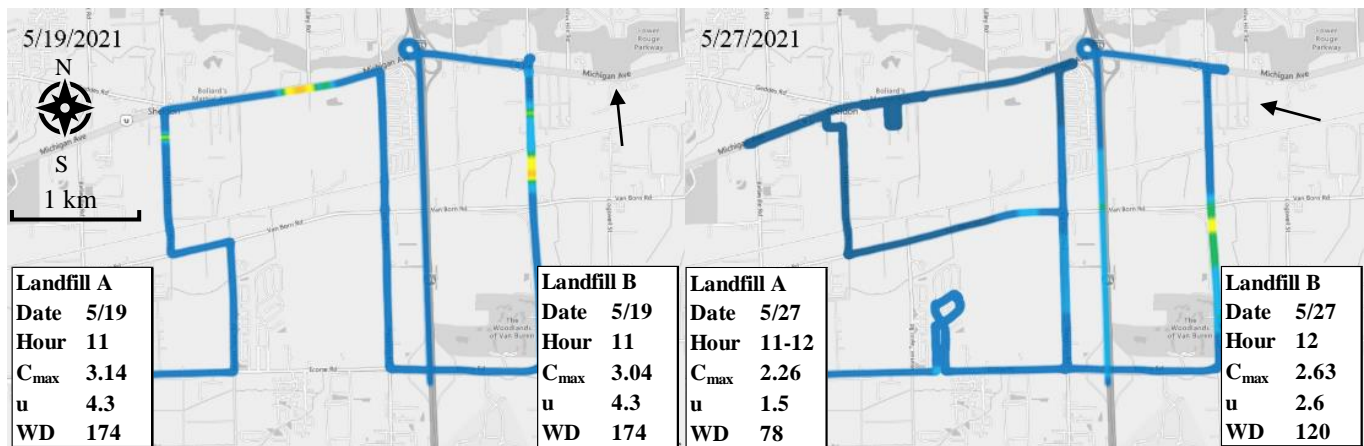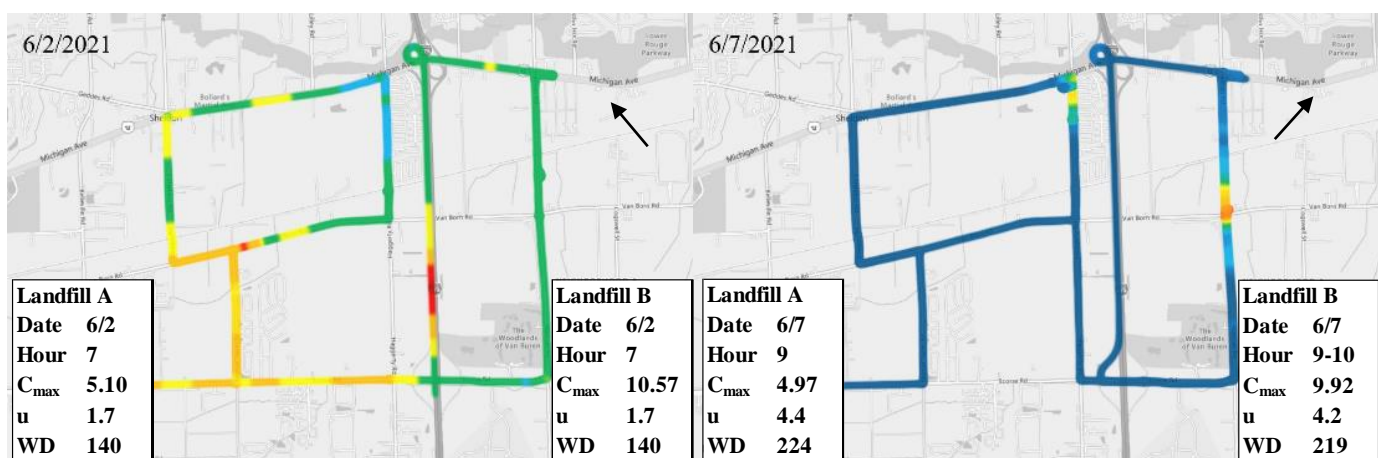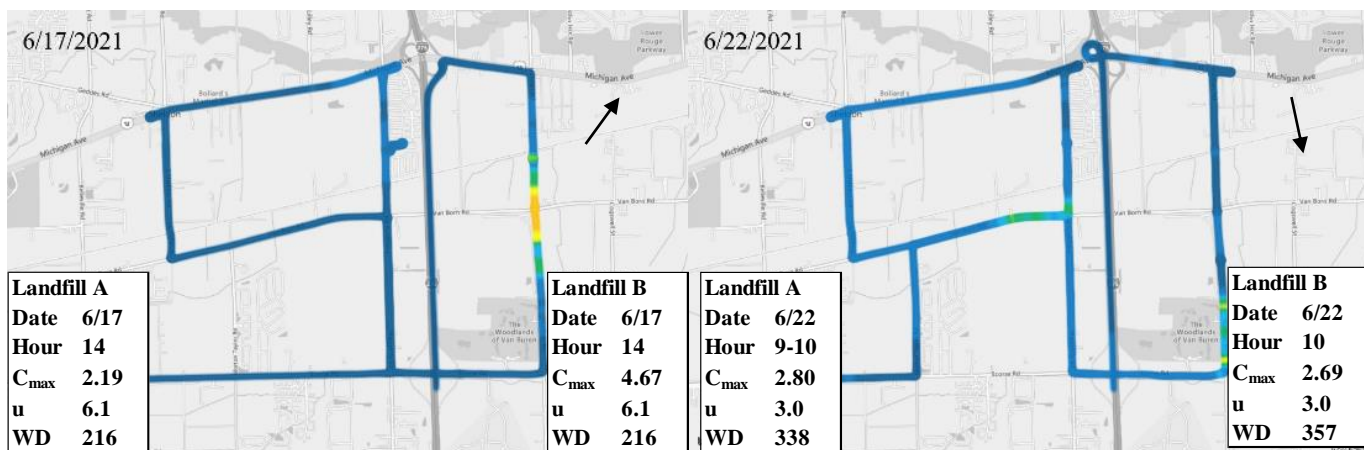



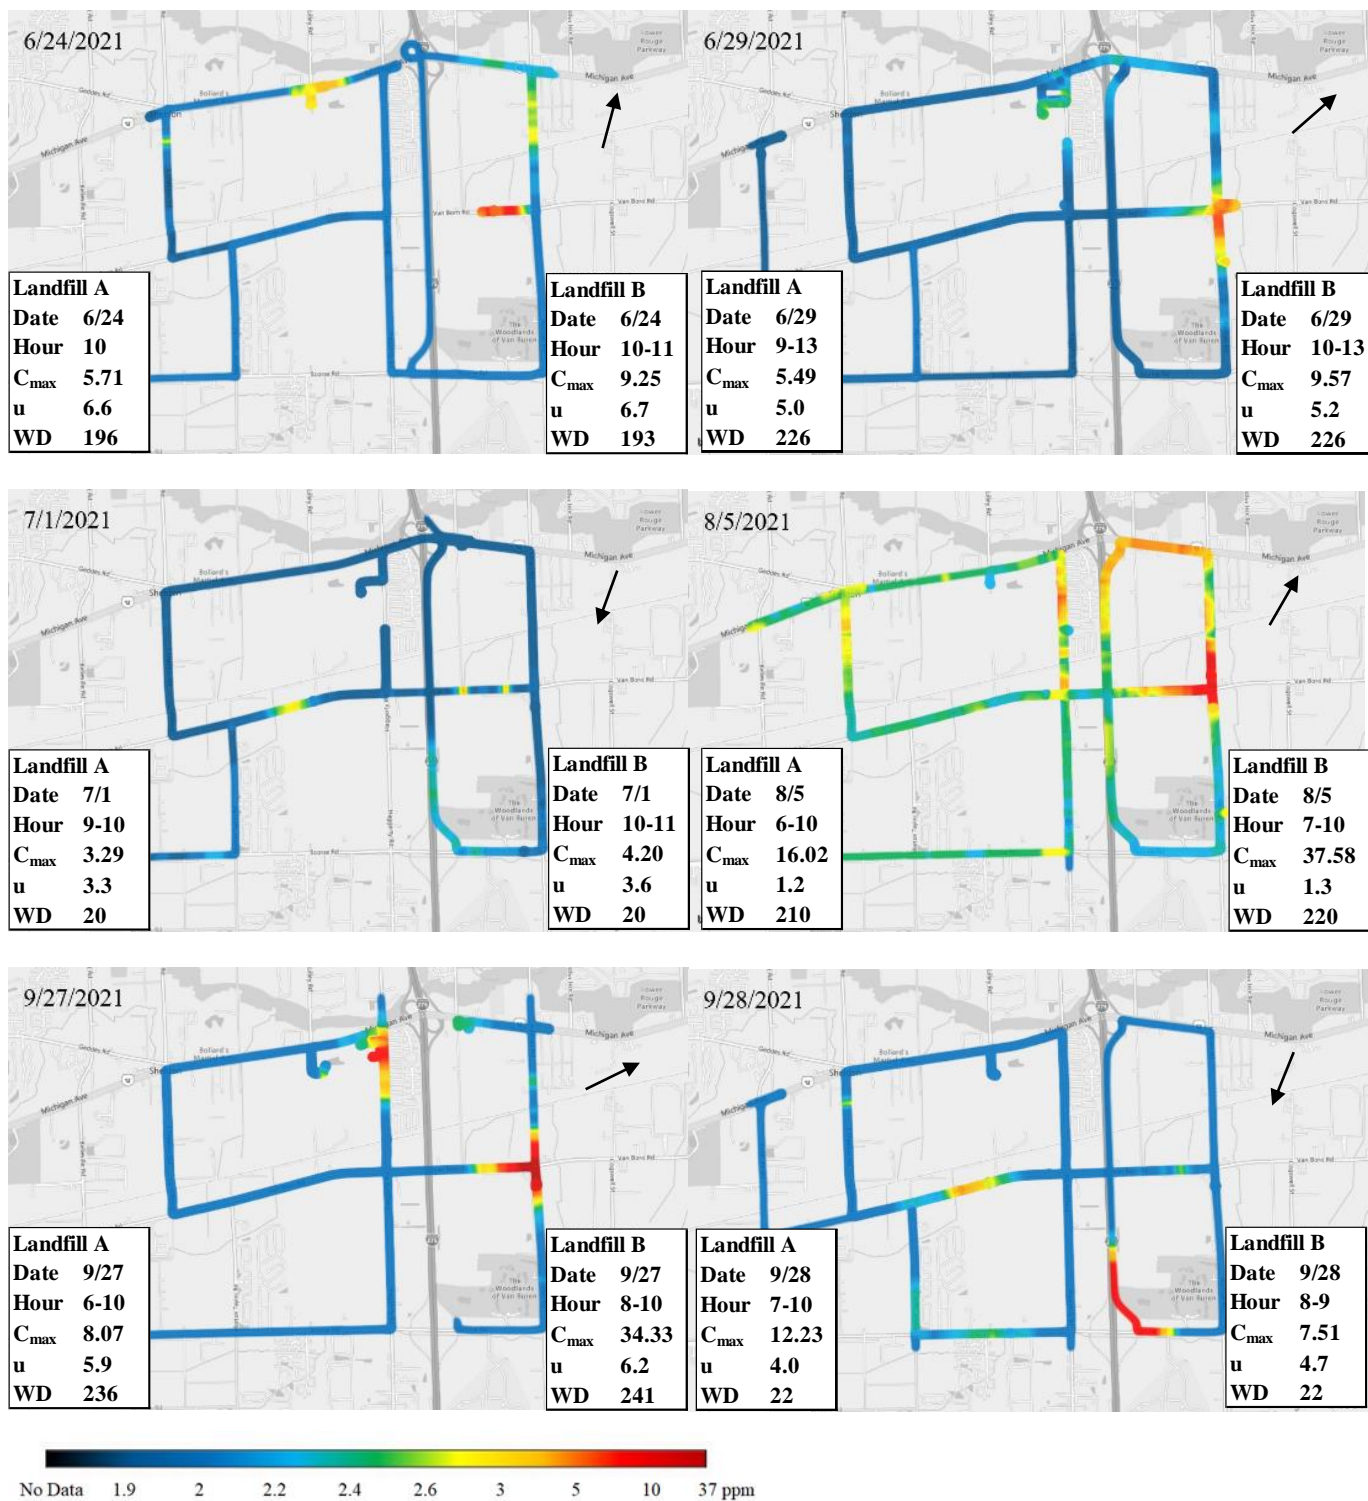

**Figure S5.** Maps of daily CH<sub>4</sub> concentration measured at Landfills A and B. Arrow indicates the dominant wind direction. Date, hour-of-day, maximum concentration (C<sub>max</sub>, ppm), wind speed (u, m/s) and dominant wind direction (WD, °) are listed for each map.

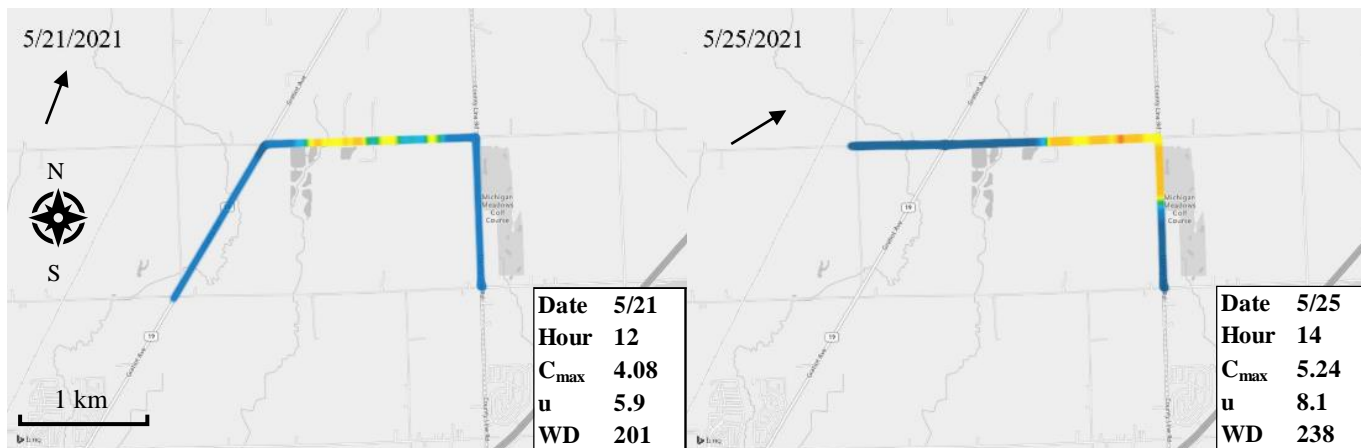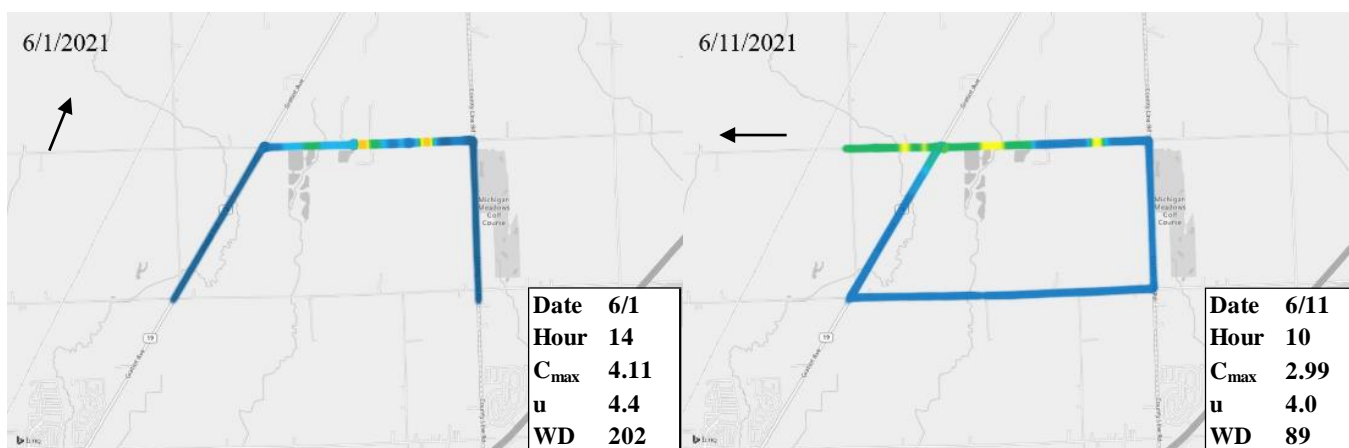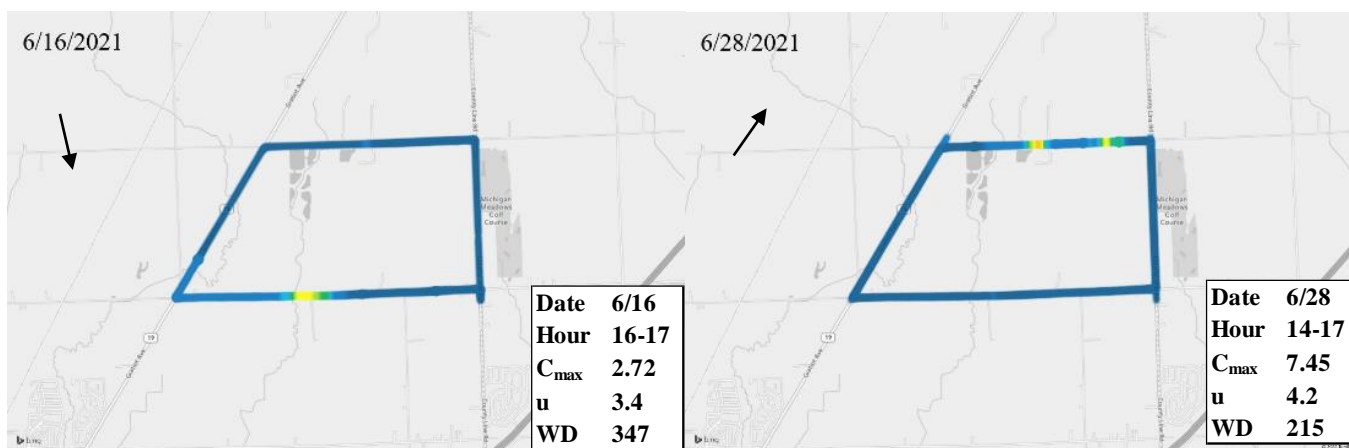

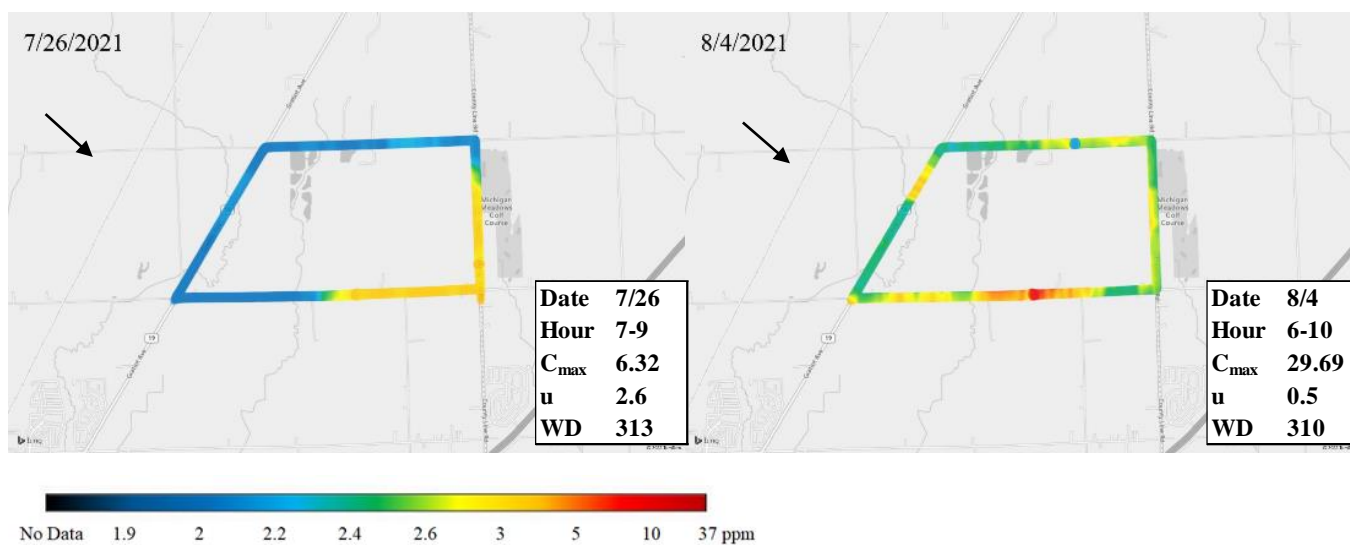

**Figure S6.** Maps of daily  $\text{CH}_4$  concentration measured at Landfill D.

Arrow indicates the dominant wind direction. Date, hour-of-day, maximum concentration ( $C_{\max}$ , ppm), wind speed (u, m/s) and dominant wind direction (WD, °) are listed for each map.

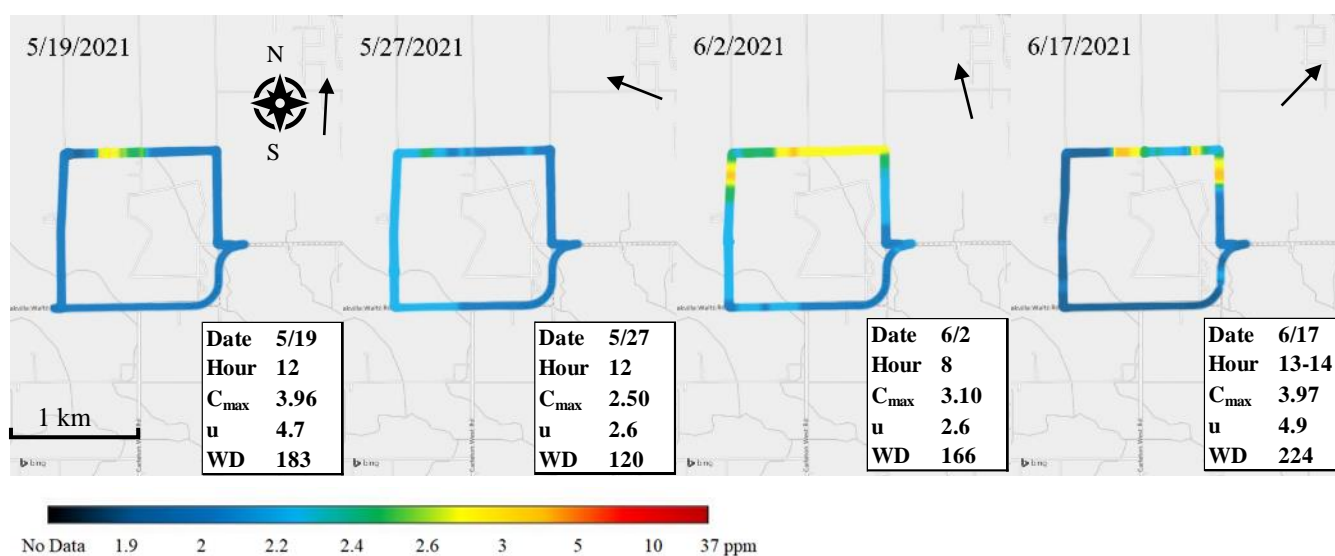

**Figure S7.** Maps of daily CH<sub>4</sub> concentration measured at Landfill E.

Arrow indicates the dominant wind direction. Date, hour-of-day, maximum concentration (C<sub>max</sub>, ppm), wind speed (u, m/s) and dominant wind direction (WD, °) are listed for each map.

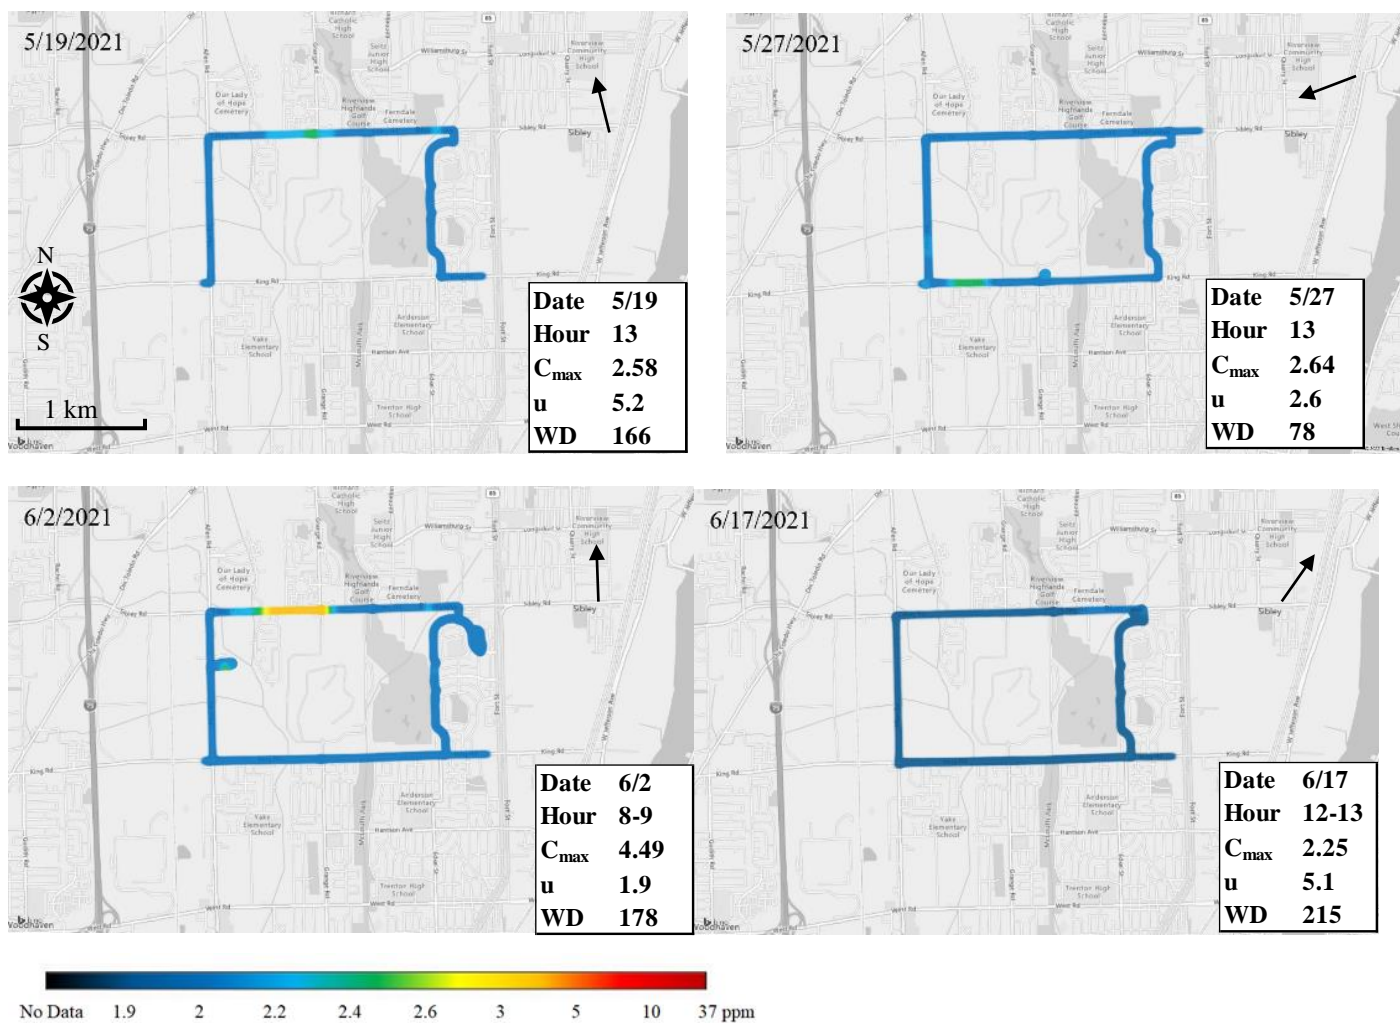

**Figure S8.** Maps of daily CH<sub>4</sub> concentration measured at Landfill F.

Arrow indicates the dominant wind direction. Date, hour-of-day, maximum concentration (C<sub>max</sub>, ppm), wind speed (u, m/s) and dominant wind direction (WD, °) are listed for each map.



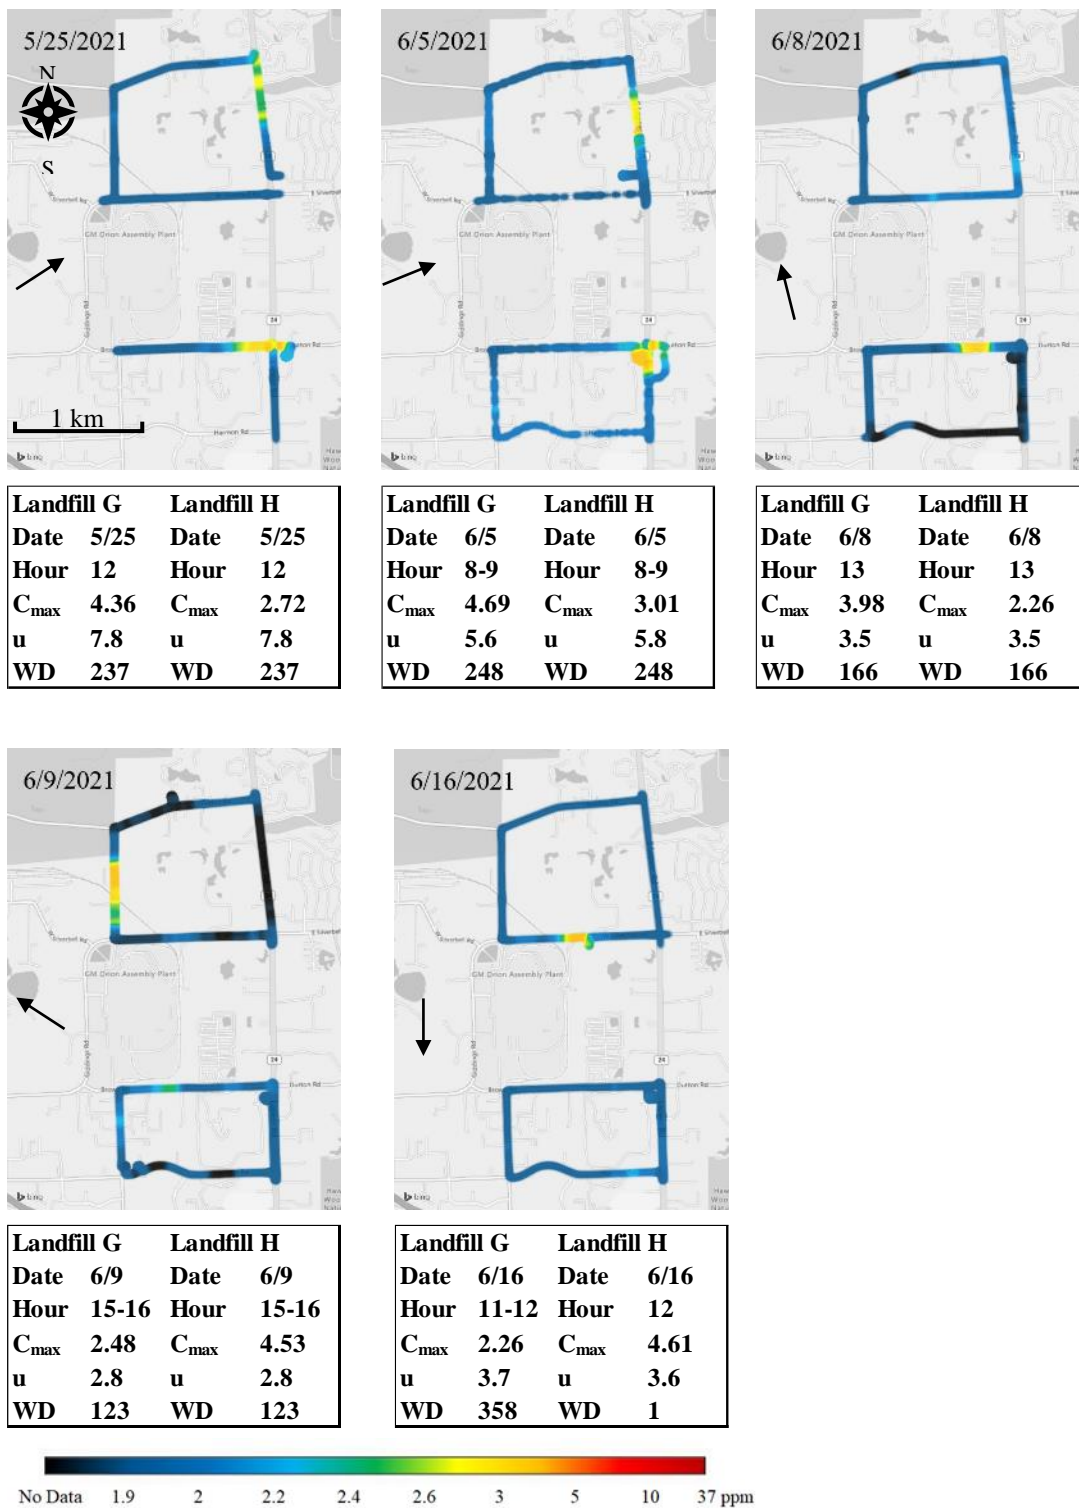

**Figure S9.** Maps of daily CH<sub>4</sub> concentration measured at Landfills G and H.

Arrow indicates the dominant wind direction. Date, hour-of-day, maximum concentration ( $C_{max}$ , ppm), wind speed (u, m/s) and dominant wind direction (WD, °) are listed for each map.

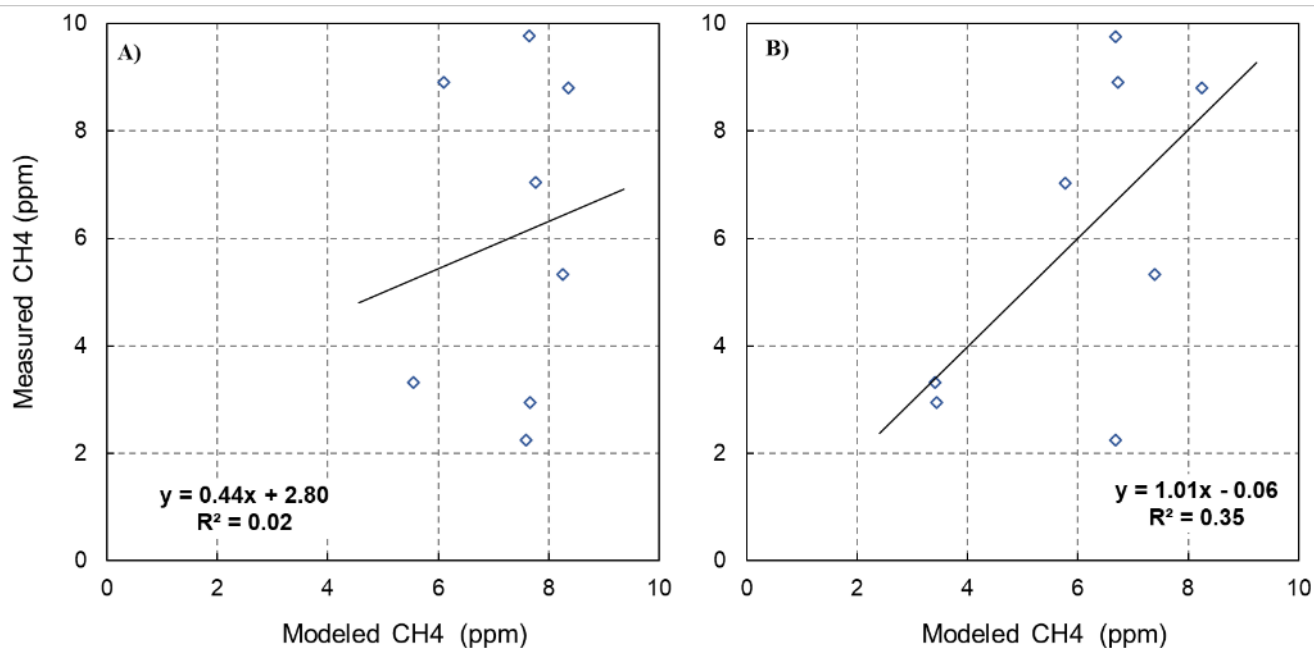

**Figure S10.** Scatter plots of measured CH<sub>4</sub> daily maximum concentrations (< 10 ppm) against the modeled value calculated with a) Model 6 and b) Eq. S4 optimized by the GRG nonlinear method.

Eq. S4:

$$C_{\max} = -3.5 + \frac{1.26 \times 10^7}{(1.48 \times 10^5 + H)(5.55 + u)} \quad (\text{S4})$$

## References

1. Czepiel, P.M.; Shorter, J.H.; Mosher, B.; Allwine, E.; McManus, J.B.; Harriss, R.C.; Kolb, C.E.; Lamb, B.K. The Influence of Atmospheric Pressure on Landfill Methane Emissions. *Waste Manag.* **2003**, *23*, 593–598, doi:10.1016/S0956-053X(03)00103-X.
2. Chen, H.; Zhu, T.; Li, B.; Fang, C.; Nie, M. The Thermal Response of Soil Microbial Methanogenesis Decreases in Magnitude with Changing Temperature. *Nat. Commun.* **2020**, *11*, 5733, doi:10.1038/s41467-020-19549-4.
3. US EPA, O. 2017 National Emissions Inventory (NEI) Data Available online: <https://www.epa.gov/air-emissions-inventories/2017-national-emissions-inventory-nei-data> (accessed on 7 May 2023).
